# Supplementary material
Source: Springer Nature journal article supplement (https://www.springermedizin.de/resource/supplementary/12905_2011_266_MOESM1_ESM.pdf/9518320)
Supplement: MOESM1 [file 9518320]

**Table 1.** Women's and husband's characteristic in relation to exposure to physical and sexual violence , crude and adjusted odds ratios (95% CI)

|                                                          | Characteristic of women and their husbands | All women<br>N=765 | Physical violence<br>n=84 |                              | Sexual violence<br>n=165 |                              |
|----------------------------------------------------------|--------------------------------------------|--------------------|---------------------------|------------------------------|--------------------------|------------------------------|
|                                                          |                                            |                    | OR<br>(CI 95%)            | AOR <sup>1</sup><br>(95% CI) | OR<br>(CI 95%)           | AOR <sup>2</sup><br>(CI 95%) |
| <b>Women's age</b>                                       | >35 years                                  | 216 (28%)          | 1                         |                              | 1                        |                              |
|                                                          | ≤ 35 years                                 | 549 (72%)          | 0.92<br>(0.56 – 1.52)     |                              | 0.89<br>(0.61 – 1.29)    |                              |
| <b>Women's education</b>                                 | > 9 years                                  | 305 (40%)          | 1                         |                              | 1                        |                              |
|                                                          | ≤ 9 years                                  | 460 (60%)          | 0.92<br>(0.58 – 1.46)     |                              | 1.38<br>(0.96 – 1.98)    |                              |
| <b>Women's economic independency</b>                     | No own income                              | 609 (80%)          | 1                         |                              | 1                        |                              |
|                                                          | Have own income                            | 156 (20%)          | 0.69<br>(0.37 – 1.27)     |                              | 1.71*<br>(1.15 – 2.55)   | 1.65*<br>(1.08 – 2.52)       |
| <b>Children</b>                                          | 1                                          | 134 (18%)          | 1                         |                              | 1                        |                              |
|                                                          | ≥2                                         | 631 (82%)          | 1.07<br>(0.59 – 1.97)     |                              | 0.9<br>(0.58 – 1.41)     |                              |
| <b>Geographical area</b>                                 | Lowland                                    | 432 (57%)          | 1                         |                              | 1                        |                              |
|                                                          | Highland                                   | 330 (43%)          | 0.97<br>(0.62 – 1.54)     |                              | 2.04*<br>(1.44 – 2.9)    | 0.53<br>(0.37 – 0.76)        |
| <b>Husband's age</b>                                     | >35 years                                  | 410 (54%)          | 1                         |                              | 1                        |                              |
|                                                          | ≤35 years                                  | 355 (46%)          | 1.17<br>(0.74 – 1.84)     |                              | 1.65*<br>(1.17 – 2.34)   | 1.71*<br>(1.19 – 2.47)       |
| <b>Husband's education</b>                               | > 9 years                                  | 254 (33%)          | 1                         |                              | 1                        |                              |
|                                                          | ≤ 9 years                                  | 511 (67%)          | 0.99<br>(0.62 – 1.62)     |                              | 1.96*<br>(1.31 – 2.93)   | 2.07*<br>(1.36 – 3.17)       |
| <b>Husband's type of work</b>                            | Non Agricultural                           | 345 (45%)          | 1                         |                              | 1                        |                              |
|                                                          | Agricultural                               | 420 (55%)          | 1.94 *<br>(1.19 – 3.16)   | 1.47<br>(0.85 – 2.54)        | 0.8<br>(0.57 – 1.14)     |                              |
| <b>Husband stole her money</b>                           | Never                                      | 750 (98%)          | 1                         |                              | 1                        |                              |
|                                                          | Yes, Once or more                          | 15 (2%)            | 5.73*<br>(1.99 – 16.5)    | 2.84<br>(0.64 – 12.6)        | 1.83<br>(0.62 – 5.44)    |                              |
| <b>Husband share his income</b>                          | Yes                                        | 726 (95%)          | 1                         |                              | 1                        |                              |
|                                                          | No                                         | 39 (5%)            | 2.56*<br>(1.19 – 5.68)    | 0.95<br>(0.33 – 2.71)        | 2.68*<br>(1.38 – 5.20)   | 1.96<br>(0.96 – 4.00)        |
| <b>Husband has other woman</b>                           | No                                         | 726 (95%)          | 1                         |                              | 1                        |                              |
|                                                          | Yes                                        | 39 (5%)            | 13.8*<br>(6.97 – 27.39)   | 8.15*<br>(3.64 -18.3)        | 3.36*<br>(1.74 – 6.47)   | 2.31*<br>(1.09 – 4.88)       |
| <b>Husband drink alcohol</b>                             | No                                         | 722 (94%)          | 1                         |                              | 1                        |                              |
|                                                          | Yes                                        | 43 (6%)            | 9.95*<br>(5.19 - 19.1)    | 5.39*<br>(2.46 – 11.8)       | 2.52*<br>(1.33 - 4.77)   | 1.81<br>(0.88 – 3.73)        |
| <b>Husband witnessed his mother being hit as a child</b> | No                                         | 749 (98%)          | 1                         |                              | 1                        |                              |
|                                                          | Yes                                        | 16 (2%)            | 15.2*<br>(5.36 - 42.39)   | 11.6*<br>(3.56 – 38.0)       | 2.89*<br>(1.06 - 7.89)   | 1.93<br>(0.63-5.87)          |
| <b>Husband involved in fight with other men</b>          | No                                         | 737 (96%)          | 1                         |                              | 1                        |                              |
|                                                          | Yes                                        | 25 (4%)            | 6.05*<br>(2.62 – 14.0)    | 5.16*<br>(1.96 – 13.5)       | 2.1<br>(0.91 – 4.85)     | -                            |

<sup>1</sup>Adjusted for the variables Husband's type of work, Husband stole her money, Husband share his income, husband has other woman, Husband drink alcohol, Husband witnessed his mother being hit as a child, Husband involved in fight with other men.

<sup>2</sup>Adjusted for the variables Women's economic independency, Geographical area, Husband's age, Husband's education, Husband share his income, husband has other woman, Husband drink alcohol, Husband witnessed his mother being hit as a child

**Table 2.** Association between women’s attitudes towards marital norms, justifications for a man to hit his wife and women’s right to refuse sex and physical or sexual violence (OR, 95% CI)

| ATTITUDES                                                   | All women<br>n=765 | Physical violence |             | Sexual violence |              |
|-------------------------------------------------------------|--------------------|-------------------|-------------|-----------------|--------------|
|                                                             |                    | OR                | CI 95%      | OR              | CI 95%       |
| <b>GENDER ROLES</b>                                         |                    |                   |             |                 |              |
| <b>Good wife obeys husband</b>                              |                    |                   |             |                 |              |
| Disagree                                                    | 42%                | 1                 |             | 1               |              |
| Agree                                                       | 58%                | 0.71              | 0.45 – 1.12 | 1.44*           | 1.01 – 2.06  |
| <b>Family problems should not be discussed outside</b>      |                    |                   |             |                 |              |
| Disagree                                                    | 6%                 | 1                 |             | 1               |              |
| Agree                                                       | 94%                | 0.56              | 0.24 – 1.32 | 0.82            | 0.39 – 1.71  |
| <b>A man should show who is the boss</b>                    |                    |                   |             |                 |              |
| Disagree                                                    | 17%                | 1                 |             | 1               |              |
| Agree                                                       | 83%                | 1.31              | 0.67 – 2.55 | 1.89*           | 1.09 – 3.26  |
| <b>A wife is obliged to have sex with her husband</b>       |                    |                   |             |                 |              |
| Disagree                                                    | 19%                | 1                 |             | 1               |              |
| Agree                                                       | 81%                | 0.48*             | 0.29 – 0.80 | 0.82            | 0.53 – 1.26  |
| <b>Woman should be able to choose own friends</b>           |                    |                   |             |                 |              |
| Agree                                                       | 58%                | 1                 |             | 1               |              |
| Disagree                                                    | 42%                | 1.32              | 0.83 – 2.08 | 0.99            | 0.69 – 1.41  |
| <b>Others outside family should intervene</b>               |                    |                   |             |                 |              |
| Agree                                                       | 66%                | 1                 |             | 1               |              |
| Disagree                                                    | 34%                | 0.58*             | 0.34 – 0.99 | 0.76            | 0.52 – 1.11  |
| <b>JUSTIFICATION TO HIT</b>                                 |                    |                   |             |                 |              |
| Hitting wife is never justified                             | 42%                | 1                 |             | 1               |              |
| Hitting wife is justified for one reason only               | 39%                | 1.47              | 0.88 – 2.45 | 1.19            | 0.79 – 1.764 |
| Hitting wife is justified for two or more reasons           | 16%                | 1.69              | 0.89 – 3.20 | 2.09*           | 1.30 – 3.38  |
| <b>JUSTIFICATION TO REFUSE SEX</b>                          |                    |                   |             |                 |              |
| to refuse sex is justified for all four reasons             | 59%                | 1                 |             | 1               |              |
| to refuse sex is justified for up to 3 reasons              | 31%                | 0.81              | 0.47 – 1.41 | 0.76            | 0.47 – 1.07  |
| to refuse sex is justified for 1 reason or no reason at all | 8%                 | 2.98*             | 1.54 – 5.77 | 0.74            | 0.37 – 1.47  |
